# Supplementary material for: Digit ratio (2D:4D) and transgender identity: new original data and a meta-analysis
Source: PubMed Central journal article supplement (PMC7653965; doi:10.1038/s41598-020-72486-6), 2020-11-09
Supplement: 41598_2020_72486_MOESM1_ESM.pdf [file 41598_2020_72486_MOESM1_ESM.pdf]

## Online supplement to the article

# Digit ratio (2D:4D) and transgender identity: new original data and a meta-analysis

Eva-Maria Siegmann\*<sup>1</sup>, Tobias Müller<sup>1,2</sup>, Isabelle Dziadeck<sup>1</sup>, Christiane Mühle<sup>1</sup>, Bernd Lenz<sup>†,1,3</sup>, Johannes Kornhuber<sup>†,1</sup>

<sup>1</sup> Department of Psychiatry and Psychotherapy, Friedrich-Alexander University Erlangen-Nürnberg (FAU), Germany.

<sup>2</sup> Psychiatric Practice, Treibberg 5, 90403 Nuremberg, Germany

<sup>3</sup> Department of Addictive Behavior and Addiction Medicine, Central Institute of Mental Health (CIMH), Medical Faculty Mannheim, Heidelberg University, Germany.

<sup>†</sup>Bernd Lenz and Johannes Kornhuber should be considered joint senior author.

\*Corresponding author at: Department of Psychiatry and Psychotherapy, Friedrich-Alexander University Erlangen-Nürnberg (FAU), Schwabachanlage 6, D-91054 Erlangen, Germany, Phone: +49 9131 85-34166, E-Mail: [eva-maria.siegmann@uk-erlangen.de](mailto:eva-maria.siegmann@uk-erlangen.de)

## Table of contents

|                                                                                                                              |    |
|------------------------------------------------------------------------------------------------------------------------------|----|
| Supplementary Table S1. Cronbach's alpha values for GIDYQ and UGDS .....                                                     | 3  |
| Supplementary Table S2. Pearson correlations of gender dysphoria scale scores with 2D:4D .....                               | 4  |
| Supplementary Table S3. Pearson correlations between 2D:4D and sexual orientation in transgender individuals .....           | 5  |
| Supplementary Table S4. Frequencies of early and late onset gender dysphoria .....                                           | 5  |
| Supplementary Table S5. Coding protocol .....                                                                                | 6  |
| Supplementary Table S6. Characteristics of all included studies.....                                                         | 13 |
| Supplementary Table S7. Results of the meta-regression and subgroup analyses .....                                           | 16 |
| Supplementary Figure S1. PRISMA flow chart .....                                                                             | 17 |
| Supplementary Figure S2. Funnel plot of the meta-analysis comparing 2D:4D among MtF individuals versus male controls .....   | 18 |
| Supplementary Figure S3. Funnel plot of the meta-analysis comparing 2D:4D among FtM individuals versus female controls ..... | 19 |

Supplementary Table S1. Cronbach's alpha values for GIDYQ and UGDS

|                                     | <b>GIDYQ</b>     | <b>UGDS</b>      |
|-------------------------------------|------------------|------------------|
| <b>MtF individuals</b><br>(n = 96)  | $\alpha = 0.647$ | $\alpha = 0.815$ |
| <b>Male controls</b><br>(n = 101)   | $\alpha = 0.294$ | $\alpha = 0.283$ |
| <b>FtM individuals</b><br>(n = 136) | $\alpha = 0.348$ | $\alpha = 0.516$ |
| <b>Female controls</b><br>(n = 102) | $\alpha = 0.671$ | $\alpha = 0.663$ |

Abbreviations: FtM, female-to-male transgender; GIDYQ, Gender Identity/Gender Dysphoria Questionnaire; MtF, male-to-female transgender; UGDS, Utrecht Gender Dysphoria Scale.

Supplementary Table S2. Pearson correlations of gender dysphoria scale scores with 2D:4D

|          | Male-to-female     |          |             |          |          | Male               |          |             |          |             | Female-to-male     |          |          |          |          | Females            |          |          |          |          |
|----------|--------------------|----------|-------------|----------|----------|--------------------|----------|-------------|----------|-------------|--------------------|----------|----------|----------|----------|--------------------|----------|----------|----------|----------|
|          | GIDYQ <sup>a</sup> |          | UGDS        |          |          | GIDYQ <sup>a</sup> |          | UGDS        |          |             | GIDYQ <sup>a</sup> |          | UGDS     |          |          | GIDYQ <sup>a</sup> |          | UGDS     |          |          |
|          | <i>N</i>           | <i>r</i> | <i>P</i>    | <i>r</i> | <i>P</i> | <i>N</i>           | <i>r</i> | <i>P</i>    | <i>r</i> | <i>P</i>    | <i>N</i>           | <i>r</i> | <i>P</i> | <i>r</i> | <i>P</i> | <i>N</i>           | <i>r</i> | <i>P</i> | <i>r</i> | <i>P</i> |
| M2D:4D   | 95                 | -0.204   | <b>.048</b> | -0.134   | .197     | 101                | 0.135    | .179        | -0.166   | .098        | 135                | 0.007    | .937     | -0.026   | .767     | 102                | 0.027    | .790     | -0.027   | .791     |
| R2D:4D   | 96                 | -0.206   | <b>.044</b> | -0.147   | .152     | 101                | 0.044    | .665        | -0.104   | .301        | 136                | 0.016    | .851     | -0.018   | .836     | 102                | 0.057    | .566     | -0.038   | .707     |
| L2D:4D   | 95                 | -0.177   | .086        | -0.107   | .302     | 101                | 0.202    | <b>.043</b> | -0.202   | <b>.043</b> | 135                | -0.008   | .924     | -0.029   | .740     | 102                | -0.006   | .952     | -0.012   | .902     |
| 2D:4Dr-l | 95                 | -0.039   | .705        | -0.052   | .618     | 101                | -0.229   | <b>.021</b> | 0.148    | .139        | 135                | 0.040    | .642     | 0.015    | .862     | 102                | 0.080    | .421     | -0.031   | .758     |

*P* < 0.05 in bold, <sup>a</sup>reversed. GIDYQ, Gender Identity/Gender Dysphoria Questionnaire; UGDS, Utrecht Gender Dysphoria Scale; 2D:4D, second-to-fourth finger length ratio; M2D:4D, mean of R2D:4D and L2D:4D; R2D:4D, right-hand 2D:4D; R2D, length of the right-hand index finger; R4D, length of the right-hand ring finger; L2D:4D, left-hand 2D:4D; L2D, length of the left-hand index finger; L4D, length of the left-hand ring finger; 2D:4Dr-l, difference between R2D:4D and L2D:4D.

Supplementary Table S3. Pearson correlations between 2D:4D and sexual orientation in transgender individuals

|                        |   | <b>L2D:4D</b> | <b>R2D:4D</b> | <b>M2D:4D</b> | <b>2D:4Dr-l</b> |
|------------------------|---|---------------|---------------|---------------|-----------------|
| <b>MtF individuals</b> | r | -0.040        | -0.069        | -0.059        | -0.043          |
|                        | p | 0.708         | 0.514         | 0.582         | 0.691           |
|                        | n | 90            | 91            | 90            | 90              |
| <b>FtM individuals</b> | r | 0.116         | 0.036         | 0.084         | -0.111          |
|                        | p | 0.185         | 0.679         | 0.338         | 0.203           |
|                        | n | 133           | 134           | 133           | 133             |

Abbreviations: 2D:4Dr-l, difference between right and left hand 2D:4D; FtM, female-to-male transgender; L2D:4D, left hand 2D:4D; M2D:4D, mean of right and left hand 2D:4D; MtF, male-to-female transgender; n, sample size; R2D:4D, right hand 2D:4D.

Supplementary Table S4. Frequencies of early and late onset gender dysphoria

|                   | <b>MtF individuals</b> |             | <b>FtM individuals</b> |             |
|-------------------|------------------------|-------------|------------------------|-------------|
|                   | <b>Early</b>           | <b>Late</b> | <b>Early</b>           | <b>Late</b> |
| <b>Question 1</b> | 40.0%                  | 17.3%       | 66.2%                  | 5.9%        |
| <b>Question 2</b> | 57.3%                  | 12.7%       | 75.5%                  | 4.6%        |

Annotations: Questions could be answered with “yes”, “no”, or “I don’t know”. Question 1: “Did you identify with the other gender before puberty?”. Question 2: “Have you already experienced discomfort with your own gender during childhood?”

Abbreviations: FtM, female-to-male transgender; MtF, male-to-female transgender.

## Supplementary Table S5. Coding protocol

**Coding protocol***2D:4D and transgender identity***Inclusion criteria:**

---

- a) Year of publication: 1983-2020
- b) Publication language: English
- c) Digit ratio was measured as continuous measure
- d) Cases (transgender persons) and controls were compared concerning their digit ratio OR the correlation of digit ratio and any form of transsexuality / transgender identity (measured continuously) was examined OR both
- e) In case-control studies, controls were not diagnosed with any form of transsexuality or gender dysphoria
- f) Effect sizes or associated data to compute effect sizes are reported

**Exclusion criteria:**

---

- a) Abstracts or pilot data
  - b) Publication language other than English
  - c) Digit ratio was measured as a categorical measure
  - d) Only partial correlations or  $\beta$ -coefficients from multiple regression models are reported
-

**Coding procedure:**

---

- (a) One line represents one effect size
- (b) If effect sizes are reported separately for the whole sample and for subgroups, only information concerning the whole sample will be extracted. If information is only reported for subgroups, every subgroup will be treated as distinct sample (variable sno).
- (c) If there are multiple effect sizes within one sample concerning different outcome variables (e.g. different ways of measuring 2D:4D), every effect size will be reported in its own line. These effect sizes are coded as dependent by allocating the same number for the variable sno.
- (d) No computations should be carried out while coding. Information is extracted directly without conversions.

| Variable                                  | Description                                                                                                                                                                                                                                                                                    | Code                                                                                          | Example                     |
|-------------------------------------------|------------------------------------------------------------------------------------------------------------------------------------------------------------------------------------------------------------------------------------------------------------------------------------------------|-----------------------------------------------------------------------------------------------|-----------------------------|
| <i>General and sample characteristics</i> |                                                                                                                                                                                                                                                                                                |                                                                                               |                             |
| study                                     | Study name comprising lead author and year of publication.                                                                                                                                                                                                                                     | Free specification                                                                            | Manning2000<br>Manning2000a |
| Pubyear                                   | Year of publication                                                                                                                                                                                                                                                                            | Range: [1983, 2018]                                                                           | 2007                        |
| Incl                                      | Effect size can or cannot be included in statistical analysis                                                                                                                                                                                                                                  | 0 = exclude<br>1 = include                                                                    | 1                           |
| Sid                                       | <u>Consecutive</u> number for every publication                                                                                                                                                                                                                                                | Range: [1, $\infty$ ]                                                                         | 1                           |
| Sno                                       | <u>Consecutive</u> number for every sample                                                                                                                                                                                                                                                     | Range: [1, $\infty$ ]                                                                         | 1                           |
| Colyear                                   | Year of conduct                                                                                                                                                                                                                                                                                | Range: [1983, 2018]                                                                           | 2007                        |
| Cntry                                     | Country of conduct<br>If not reported, extract affiliation of lead author as ISO-CODE 2:<br><a href="http://en.wikipedia.org/wiki/ISO_3166-1_alpha-2">http://en.wikipedia.org/wiki/ISO_3166-1_alpha-2</a><br>or „XX“ describing samples with participants originating from different countries | Free specification                                                                            | DE                          |
| Pubtype                                   | Publication type                                                                                                                                                                                                                                                                               | 1 = Peer-reviewed Journal<br>2 = Book<br>3 = Thesis (Master / PhD)<br>4 = Poster<br>5 = Other | 1                           |
| N                                         | Sample size <i>N</i>                                                                                                                                                                                                                                                                           | Range: [2, $\infty$ ]                                                                         | 100                         |
| Samtype                                   | Description of sample (coded)                                                                                                                                                                                                                                                                  | 1 = children<br>2 = students<br>(undergraduates, college)<br>3 = Adults, mixed<br>sample      | 2                           |
| Age                                       | Mean age (in years)                                                                                                                                                                                                                                                                            | Range: [0, $\infty$ ]                                                                         | 16.86                       |



| Variable                                                                      | Description                                                                                     | Code          | Example |
|-------------------------------------------------------------------------------|-------------------------------------------------------------------------------------------------|---------------|---------|
| <i>Effect sizes</i><br>(1=male; 2=male-to-female; 3=female; 4=female-to-male) |                                                                                                 |               |         |
| n1                                                                            | Sample size of male sample                                                                      | Range: [2, ∞] | 100     |
| n2                                                                            | Sample size of male-to-female sample                                                            | Range: [2, ∞] | 100     |
| n3                                                                            | Sample size of female sample                                                                    | Range: [2, ∞] | 100     |
| n4                                                                            | Sample size of female-to-male sample                                                            | Range: [2, ∞] | 100     |
| m1                                                                            | Male mean 2D:4D                                                                                 | Range: [0, ∞] | 0.9     |
| sd1                                                                           | Male standard deviation of 2D:4D                                                                | Range: [0, ∞] | 0.1     |
| ci_low1                                                                       | Lower limit of the 99% confidence interval reported for mean 2D:4D of the male sample           | Range: [0, ∞] | 0.8     |
| ci_up1                                                                        | Upper limit of the 99% confidence interval reported for mean 2D:4D of the male sample           | Range: [0, ∞] | 1.0     |
| m2                                                                            | Male-to-female mean 2D:4D                                                                       | Range: [0, ∞] | 0.9     |
| sd2                                                                           | Male-to-female standard deviation of 2D:4D                                                      | Range: [0, ∞] | 0.1     |
| ci_low2                                                                       | Lower limit of the 99% confidence interval reported for mean 2D:4D of the male-to-female sample | Range: [0, ∞] | 0.8     |
| ci_up2                                                                        | Upper limit of the 99% confidence interval reported for mean 2D:4D of the male-to-female sample | Range: [0, ∞] | 1.0     |
| m3                                                                            | Female mean 2D:4D                                                                               | Range: [0, ∞] | 0.9     |
| sd3                                                                           | Female standard deviation of 2D:4D                                                              | Range: [0, ∞] | 0.1     |
| ci_low3                                                                       | Lower limit of the 99% confidence interval reported for mean 2D:4D of the female sample         | Range: [0, ∞] | 0.8     |
| ci_up3                                                                        | Upper limit of the 99% confidence interval reported for mean 2D:4D of the female sample         | Range: [0, ∞] | 1.0     |
| m4                                                                            | Female-to-male mean 2D:4D                                                                       | Range: [0, ∞] | 0.9     |

| Variable                                                                      | Description                                                                                            | Code           | Example |
|-------------------------------------------------------------------------------|--------------------------------------------------------------------------------------------------------|----------------|---------|
| <i>Effect sizes</i><br>(1=male; 2=male-to-female; 3=female; 4=female-to-male) |                                                                                                        |                |         |
| sd4                                                                           | Female-to-male standard deviation of 2D:4D                                                             | Range: [0, ∞]  | 0.1     |
| ci_low4                                                                       | Lower limit of the 99% confidence interval reported for mean 2D:4D of the female-to-male sample        | Range: [0, ∞]  | 0.8     |
| ci_up4                                                                        | Upper limit of the 99% confidence interval reported for mean 2D:4D of the female-to-male sample        | Range: [0, ∞]  | 1.0     |
| n_m                                                                           | <b>Only in the case of correlative data:</b> Sample size of male sample                                | Range: [2, ∞]  | 100     |
| n_f                                                                           | <b>Only in the case of correlative data:</b> Sample size of female sample                              | Range: [2, ∞]  | 100     |
| r_m                                                                           | <b>Only in the case of correlative data:</b> Pearson's correlation coefficient r for the male sample   | Range: [-1, 1] | 0.5     |
| r_f                                                                           | <b>Only in the case of correlative data:</b> Pearson's correlation coefficient r for the female sample | Range: [-1, 1] | 0.5     |

| Variable                      | Description                                                                                                                                                                                                                                                                                                                               | Code                                                                   | Example |
|-------------------------------|-------------------------------------------------------------------------------------------------------------------------------------------------------------------------------------------------------------------------------------------------------------------------------------------------------------------------------------------|------------------------------------------------------------------------|---------|
| <i>Additional information</i> |                                                                                                                                                                                                                                                                                                                                           |                                                                        |         |
| qual1                         | Category Selection <ul style="list-style-type: none"> <li>- Is the case definition adequate?</li> <li>- Representativeness of cases</li> <li>- Selection of controls</li> <li>- Definition of controls</li> </ul>                                                                                                                         | 0 = 0 Stars<br>1 = 1 Star<br>2 = 2 Stars<br>3 = 3 Stars<br>4 = 4 Stars | 1       |
| qual2                         | Category Comparability: Comparability of cases and controls on the basis of the design or analysis <ul style="list-style-type: none"> <li>- Study controls for transsexuality</li> <li>- Study controls for any additional factor</li> </ul>                                                                                              | 0 = 0 Stars<br>1 = 1 Star<br>2 = 2 Stars                               | 1       |
| qual3                         | Category Exposure <ul style="list-style-type: none"> <li>- Ascertainment of exposure</li> <li>- Same method of ascertainment for cases and controls</li> <li>- Non-response rate</li> </ul>                                                                                                                                               | 0 = 0 Stars<br>1 = 1 Star<br>2 = 2 Stars<br>3 = 3 Stars                | 1       |
| qual_r1                       | <b>Only in the case of correlative data:</b> Category Selection <ul style="list-style-type: none"> <li>- Representativeness of the sample</li> <li>- Sample size</li> <li>- Ascertainment of exposure</li> <li>- Non-respondents</li> </ul>                                                                                               | 0 = 0 Stars<br>1 = 1 Star<br>2 = 2 Stars<br>3 = 3 Stars<br>4 = 4 Stars | 1       |
| qual_r2                       | <b>Only in the case of correlative data:</b> Category Comparability: Confounding factors are controlled <ul style="list-style-type: none"> <li>- The study controls for the most important factor (diseases influencing 2D:4D. e.g. fractures, hormonal abnormalities)</li> <li>- The study controls for any additional factor</li> </ul> | 0 = 0 Stars<br>1 = 1 Star<br>2 = 2 Stars                               | 1       |
| qual_r3                       | <b>Only in the case of correlative data:</b> Category Outcome: <ul style="list-style-type: none"> <li>- Assessment of Outcome</li> <li>- The statistical test used to analyze the data is clearly described and appropriate</li> </ul>                                                                                                    | 0 = 0 Stars<br>1 = 1 Star<br>2 = 2 Stars                               | 1       |

| Variable                      | Description                                                                                                                                          | Code                                                                                                                                                                  | Example |
|-------------------------------|------------------------------------------------------------------------------------------------------------------------------------------------------|-----------------------------------------------------------------------------------------------------------------------------------------------------------------------|---------|
| <i>Additional information</i> |                                                                                                                                                      |                                                                                                                                                                       |         |
| method                        | Method of measuring 2D:4D                                                                                                                            | 1 = x-ray<br>2 = photocopy or scans<br>3 = directly from subjects' hand                                                                                               | 1       |
| rating                        | Quality of 2D:4D measurement: Have there been taken actions to assure the reproducibility of the 2D:4D value that was used for computation?          | 1 = multiple independent raters<br>2 = one rater performing multiple measurements<br>3 = one rater performing one measurement<br>4 = self-measurement by participants | 1       |
| hand                          | Subjects' hand used to compute 2D:4D                                                                                                                 | 1 = right hand only<br>2 = left hand only<br>3 = mix of both hands                                                                                                    | 1       |
| diagnosis                     | Has the diagnosis of gender dysphoria or gender identity disorder been made or verified by a clinician?                                              | 0 = no<br>1 = yes                                                                                                                                                     | 1       |
| system                        | <b>Only in the case of diagnosis = 1:</b> Which classification system has been applied when diagnosing gender dysphoria or gender identity disorder? | 1 = ICD-10<br>2 = DSM-IV(-TR)<br>3 = DSM-5<br>4 = other                                                                                                               | 1       |
| masking                       | Have all raters been blinded regarding case-control status when they recorded the digit ratio?                                                       | 0 = no<br>1 = yes                                                                                                                                                     | 1       |

Supplementary Table S6. Characteristics of all included studies.

| First author, year of publication         | MtF individuals vs. male controls |                                  |                    |                                    | FtM individuals vs. female controls |                                  |                      |                                      |
|-------------------------------------------|-----------------------------------|----------------------------------|--------------------|------------------------------------|-------------------------------------|----------------------------------|----------------------|--------------------------------------|
|                                           | $N_{\text{MtF}}$                  | 2D:4D <sub>MtF</sub><br>(M ± SD) | $N_{\text{males}}$ | 2D:4D <sub>males</sub><br>(M ± SD) | $N_{\text{FtM}}$                    | 2D:4D <sub>FtM</sub><br>(M ± SD) | $N_{\text{females}}$ | 2D:4D <sub>females</sub><br>(M ± SD) |
| Schneider et al., 2006 <sup>a,e,f,h</sup> | 63                                | 0.967 ± 0.034                    | 58                 | 0.957 ± 0.029                      | 43                                  | 0.975 ± 0.029                    | 65                   | 0.972 ± 0.028                        |
| Schneider et al., 2006 <sup>b,e,f,h</sup> | 63                                | 0.953 ± 0.036                    | 58                 | 0.952 ± 0.026                      | 43                                  | 0.964 ± 0.032                    | 65                   | 0.963 ± 0.03                         |
| Wallien et al., 2008 <sup>a,e,f</sup>     | 39                                | 0.952 ± 0.029                    | 89                 | 0.955 ± 0.041                      | 38                                  | 0.969 ± 0.05                     | 112                  | 0.978 ± 0.034                        |
| Wallien et al., 2008 <sup>b,e,f</sup>     | 38                                | 0.967 ± 0.035                    | 89                 | 0.96 ± 0.039                       | 39                                  | 0.961 ± 0.034                    | 112                  | 0.982 ± 0.032                        |
| Wallien et al., 2008 <sup>a,e,f</sup>     | 38                                | 0.955 ± 0.04                     | 71                 | 0.953 ± 0.034                      | 29                                  | 0.969 ± 0.051                    | 70                   | 0.967 ± 0.037                        |
| Wallien et al., 2008 <sup>b,e,f</sup>     | 36                                | 0.965 ± 0.037                    | 67                 | 0.966 ± 0.034                      | 24                                  | 0.987 ± 0.061                    | 70                   | 0.983 ± 0.047                        |
| Wallien et al., 2008 <sup>a,e,g</sup>     | 23                                | 0.965 ± 0.052                    | 71                 | 0.953 ± 0.034                      | 5                                   | 0.977 ± 0.028                    | 70                   | 0.967 ± 0.037                        |
| Wallien et al., 2008 <sup>b,e,g</sup>     | 20                                | 0.954 ± 0.055                    | 67                 | 0.966 ± 0.034                      | 5                                   | 0.965 ± 0.013                    | 70                   | 0.983 ± 0.047                        |
| Kraemer et al., 2009 <sup>a,e,f</sup>     | 15                                | 0.961 ± 0.028                    | 13                 | 0.959 ± 0.041                      | 14                                  | 0.982 ± 0.033                    | 2                    | 0.912 ± 0.025                        |
| Kraemer et al., 2009 <sup>b,e,f</sup>     | 15                                | 0.954 ± 0.032                    | 13                 | 0.951 ± 0.036                      | 14                                  | 0.976 ± 0.023                    | 2                    | 0.9 ± 0.017                          |
| Kraemer et al., 2009 <sup>a,e,f</sup>     | 24                                | 0.97 ± 0.027                     | 163                | 0.954 ± 0.032                      | 3                                   | 0.96 ± 0.047                     | 188                  | 0.974 ± 0.033                        |
| Kraemer et al., 2009 <sup>b,e,f</sup>     | 24                                | 0.963 ± 0.036                    | 163                | 0.954 ± 0.033                      | 3                                   | 0.955 ± 0.016                    | 188                  | 0.97 ± 0.035                         |
| Veale, 2011 <sup>a,d,g</sup>              | 117                               | 0.989 ± NA                       | 42                 | 0.997 ± NA                         | 38                                  | 0.981 ± NA                       | 84                   | 0.999 ± NA                           |

| First author, year of publication        | $N_{MtF}$ | 2D:4D <sub>MtF</sub><br>(M ± SD) | $N_{males}$ | 2D:4D <sub>males</sub><br>(M ± SD) | $N_{FtM}$ | 2D:4D <sub>FtM</sub><br>(M ± SD) | $N_{females}$ | 2D:4D <sub>females</sub><br>(M ± SD) |
|------------------------------------------|-----------|----------------------------------|-------------|------------------------------------|-----------|----------------------------------|---------------|--------------------------------------|
| Veale, 2011 <sup>a,d,g</sup>             | 191       | 0.992 ± NA                       | 90          | 0.984 ± NA                         | 41        | 0.992 ± NA                       | 154           | 0.992 ± NA                           |
| Hisasue et al., 2012 <sup>a,e,f</sup>    | NA        | NA                               | NA          | NA                                 | 37        | 0.955 ± 0.029                    | 20            | 0.999 ± 0.035                        |
| Hisasue et al., 2012 <sup>b,e,f</sup>    | NA        | NA                               | NA          | NA                                 | 37        | 0.954 ± 0.036                    | 20            | 0.979 ± 0.04                         |
| Vujovic et al., 2014 <sup>a,d,f,h</sup>  | 42        | 0.916 ± 0.058                    | 45          | 0.896 ± 0.075                      | 38        | 0.93 ± 0.046                     | 48            | 0.896 ± 0.05                         |
| Vujovic et al., 2014 <sup>b,d,f,h</sup>  | 42        | 0.928 ± 0.041                    | 45          | 0.927 ± 0.041                      | 38        | 1.013 ± 0.189                    | 48            | 0.903 ± 0.061                        |
| Atkinson et al., 2017 <sup>a,e,g</sup>   | NA        | NA                               | NA          | NA                                 | 19        | 0.967 ± 0.038                    | 25            | 0.994 ± 0.038                        |
| Atkinson et al., 2017 <sup>b,e,g</sup>   | NA        | NA                               | NA          | NA                                 | 19        | 0.986 ± 0.043                    | 25            | 0.984 ± 0.038                        |
| Leinung et al., 2017 <sup>c,d,f</sup>    | 68        | 0.978 ± 0.029                    | 19          | 0.972 ± 0.036                      | 50        | 0.983 ± 0.027                    | 18            | 0.998 ± 0.021                        |
| New original data, 2019 <sup>a,e,f</sup> | 110       | 0.963 ± 0.03                     | 101         | 0.959 ± 0.028                      | 151       | 0.972 ± 0.028                    | 102           | 0.975 ± 0.03                         |
| New original data, 2019 <sup>b,e,f</sup> | 109       | 0.969 ± 0.029                    | 101         | 0.961 ± 0.03                       | 150       | 0.971 ± 0.029                    | 102           | 0.974 ± 0.032                        |
| Richards et al., 2019 <sup>a,d,g</sup>   | 13        | 0.997 ± 0.047                    | 12          | 0.956 ± 0.046                      | 20        | 1.002 ± 0.053                    | 16            | 0.971 ± 0.046                        |
| Richards et al., 2019 <sup>b,d,g</sup>   | 14        | 0.995 ± 0.048                    | 12          | 1.003 ± 0.064                      | 20        | 1.003 ± 0.058                    | 16            | 1.000 ± 0.061                        |
| Saglam et al., 2020 <sup>a,e,f</sup>     | 45        | 0.968 ± 0.013                    | 58          | 0.973 ± 0.008                      | 54        | 0.980 ± 0.010                    | 58            | 0.998 ± 0.008                        |
| Saglam et al., 2020 <sup>b,e,f</sup>     | 45        | 0.980 ± 0.010                    | 58          | 0.970 ± 0.010                      | 54        | 0.983 ± 0.008                    | 58            | 0.990 ± 0.005                        |
| Sadr et al., 2020 <sup>a,e,f</sup>       | 89        | 0.972 ± 0.029                    | 56          | 0.959 ± 0.033                      | 104       | 0.981 ± 0.030                    | 53            | 0.983 ± 0.033                        |
| Sadr et al., 2020 <sup>b,e,f</sup>       | 88        | 0.981 ± 0.033                    | 56          | 0.974 ± 0.029                      | 104       | 0.991 ± 0.034                    | 53            | 0.991 ± 0.032                        |

| <b>Correlative data</b>                   |                    |                    |                      |                      |
|-------------------------------------------|--------------------|--------------------|----------------------|----------------------|
|                                           | Male sample        |                    | Female sample        |                      |
|                                           | $N_{\text{males}}$ | $r_{\text{males}}$ | $N_{\text{females}}$ | $r_{\text{females}}$ |
| Rothkopf et al.,<br>2014 <sup>a,d,g</sup> | 49                 | 0.05               | 89                   | 0.03                 |
| Rothkopf et al.,<br>2014 <sup>b,d,g</sup> | 49                 | -0.03              | 89                   | -0.04                |

<sup>a</sup>Right 2D:4D

<sup>d</sup>No tissue deformation when measuring 2D:4D

<sup>g</sup>Diagnosis not made by a clinician

<sup>b</sup>Left 2D:4D

<sup>e</sup>Tissue deformation when measuring 2D:4D

<sup>h</sup>Data obtained from graphs

<sup>c</sup>2D:4D of the dominant hand

<sup>f</sup>Diagnosis made by a clinician

Supplementary Table S7. Results of the meta-regression and subgroup analyses

|                                          | <b>MtF individuals vs. male controls</b> | <b>FtM individuals vs. female controls</b> |
|------------------------------------------|------------------------------------------|--------------------------------------------|
| <b>Meta-regression analyses</b>          |                                          |                                            |
| Study quality                            | $\beta = 0.002, P = 0.973$               | $\beta = 0.192, P = 0.265$                 |
| Mean age                                 | $\beta = 0.002, P = 0.654$               | $\beta = -0.010, P = 0.627$                |
| Procedure of measuring 2D:4D             | $\beta = -0.068, P = 0.072$              | $\beta = -0.036, P = 0.799$                |
| <b>Subgroup analyses</b>                 |                                          |                                            |
| Right vs. left hand                      | $z = 0.129, P = 0.897$                   | $z = 0.221, P = 0.825$                     |
| With vs. without soft tissue deformation | $z = -0.899, P = 0.369$                  | $z = 0.954, P = 0.340$                     |
| DSM-IV(-TR) vs. ICD-10                   | $z = -0.431, P = 0.666$                  | $z = 0.409, P = 0.682$                     |
| DSM-IV(-TR) vs. DSM-5                    | $z = 0.943, P = 0.346$                   | $z = -1.044, P = 0.296$                    |
| With or without blinding of 2D:4D raters | $z = 0.353, P = 0.72$                    | $z = -0.676, P = 0.499$                    |



Supplementary Figure S1. PRISMA flow chart

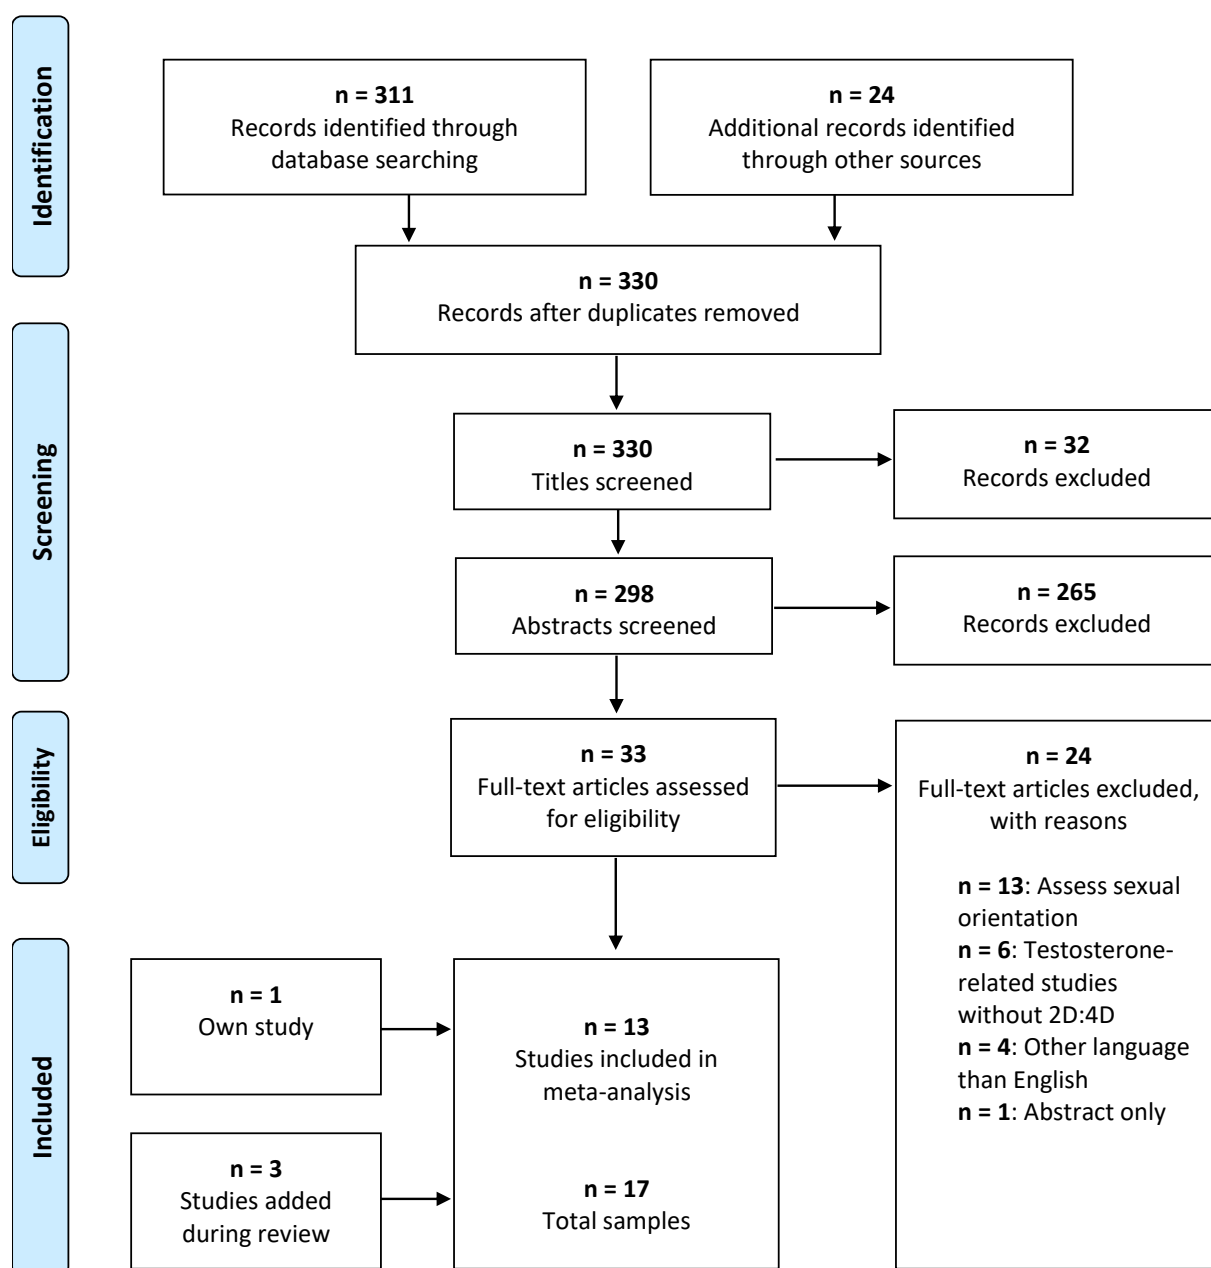

Supplementary Figure S2. Funnel plot of the meta-analysis comparing 2D:4D among MtF individuals versus male controls

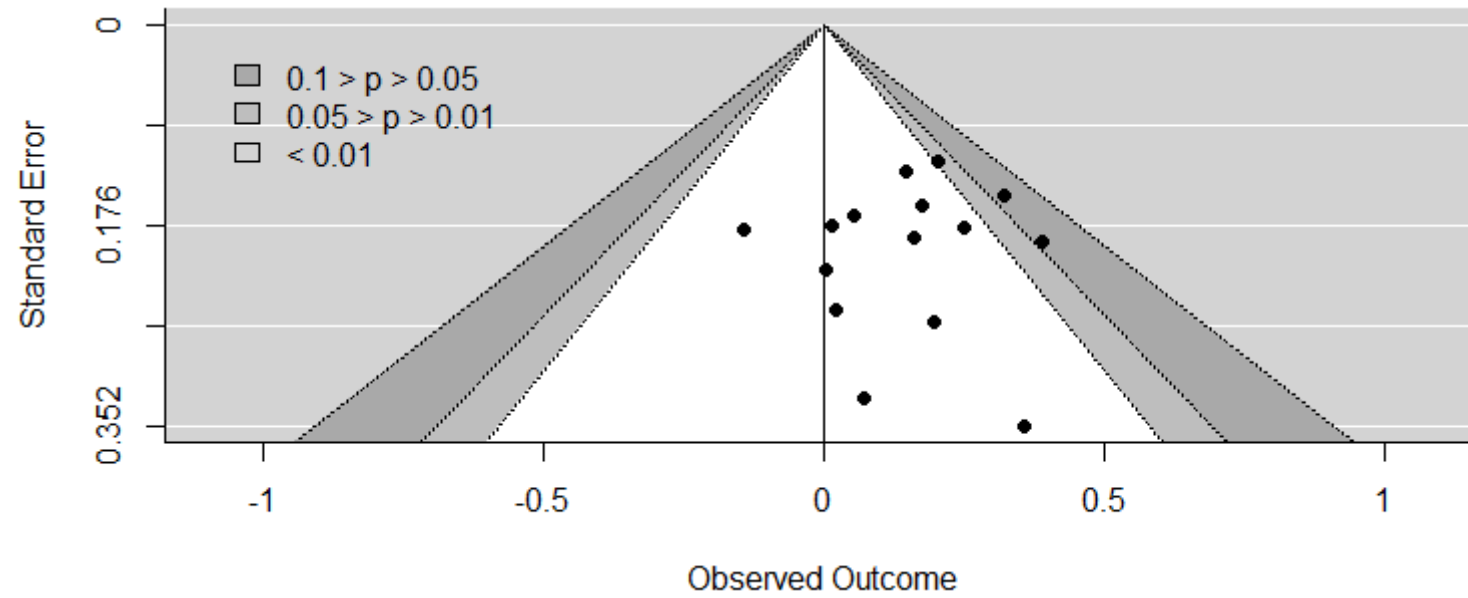

Annotation: This figure was created using R software (v3.4.2; <https://www.R-project.org/>).

Supplementary Figure S3. Funnel plot of the meta-analysis comparing 2D:4D among FtM individuals versus female controls

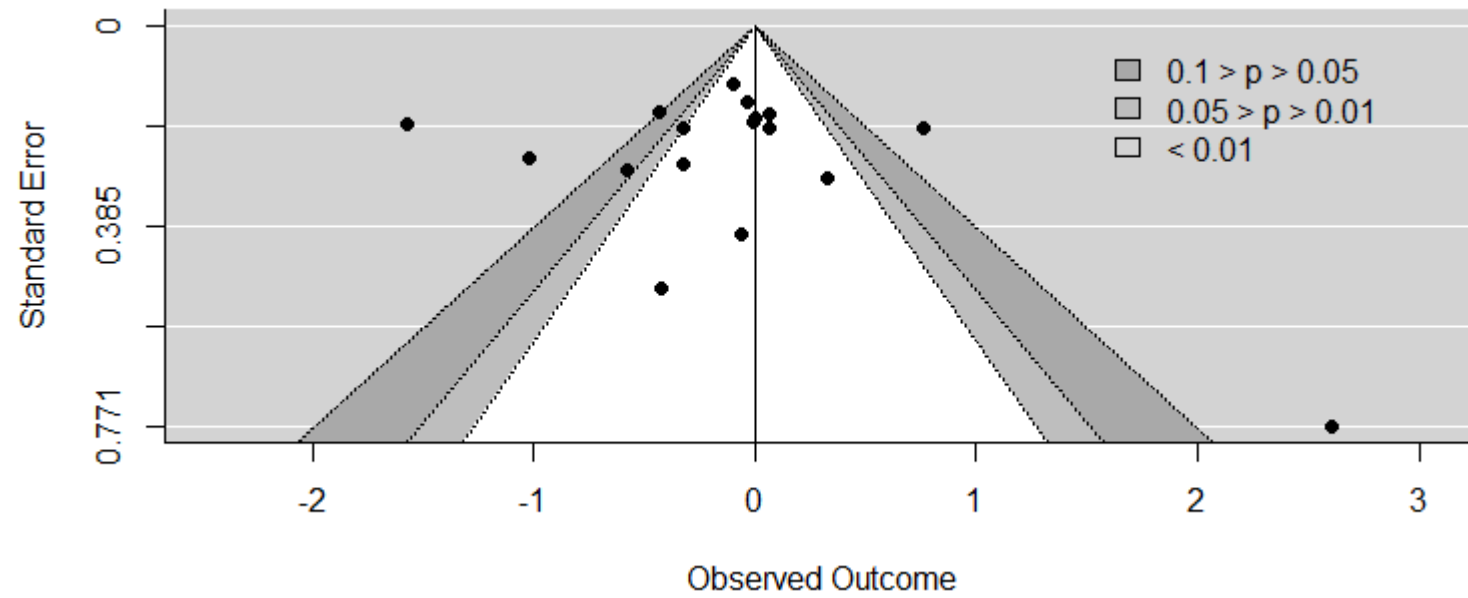

Annotation: This figure was created using R software (v3.4.2; <https://www.R-project.org/>).
